# Supplementary material
Source: ML conference proceedings conference paper supplement (https://openaccess.thecvf.com/content/WACV2024/html/Elata_Nested_Diffusion_Processes_WACV_2024_paper.html)
Supplement: Supplementary file 2 [file Elata_Nested_Diffusion_Processes_WACV_2024_supplemental.zip]

Archive with 2 entries (2 files):
- Nested_Diffusion_code.zip
- 0536_supp.pdf
